# Supplementary material for: New insight into DOC and DON in a drinking water biological aerated filter (BAF) by multimethod and correlation analysis of 3D-EEM
Source: Royal Society of Chemistry journal article supplement (doi:10.1039/c5ay02156a), 2015-01-01
Supplement: c5ay02156a1.pdf [file c5ay02156a1.pdf]

Supplementary Figures:

(a)

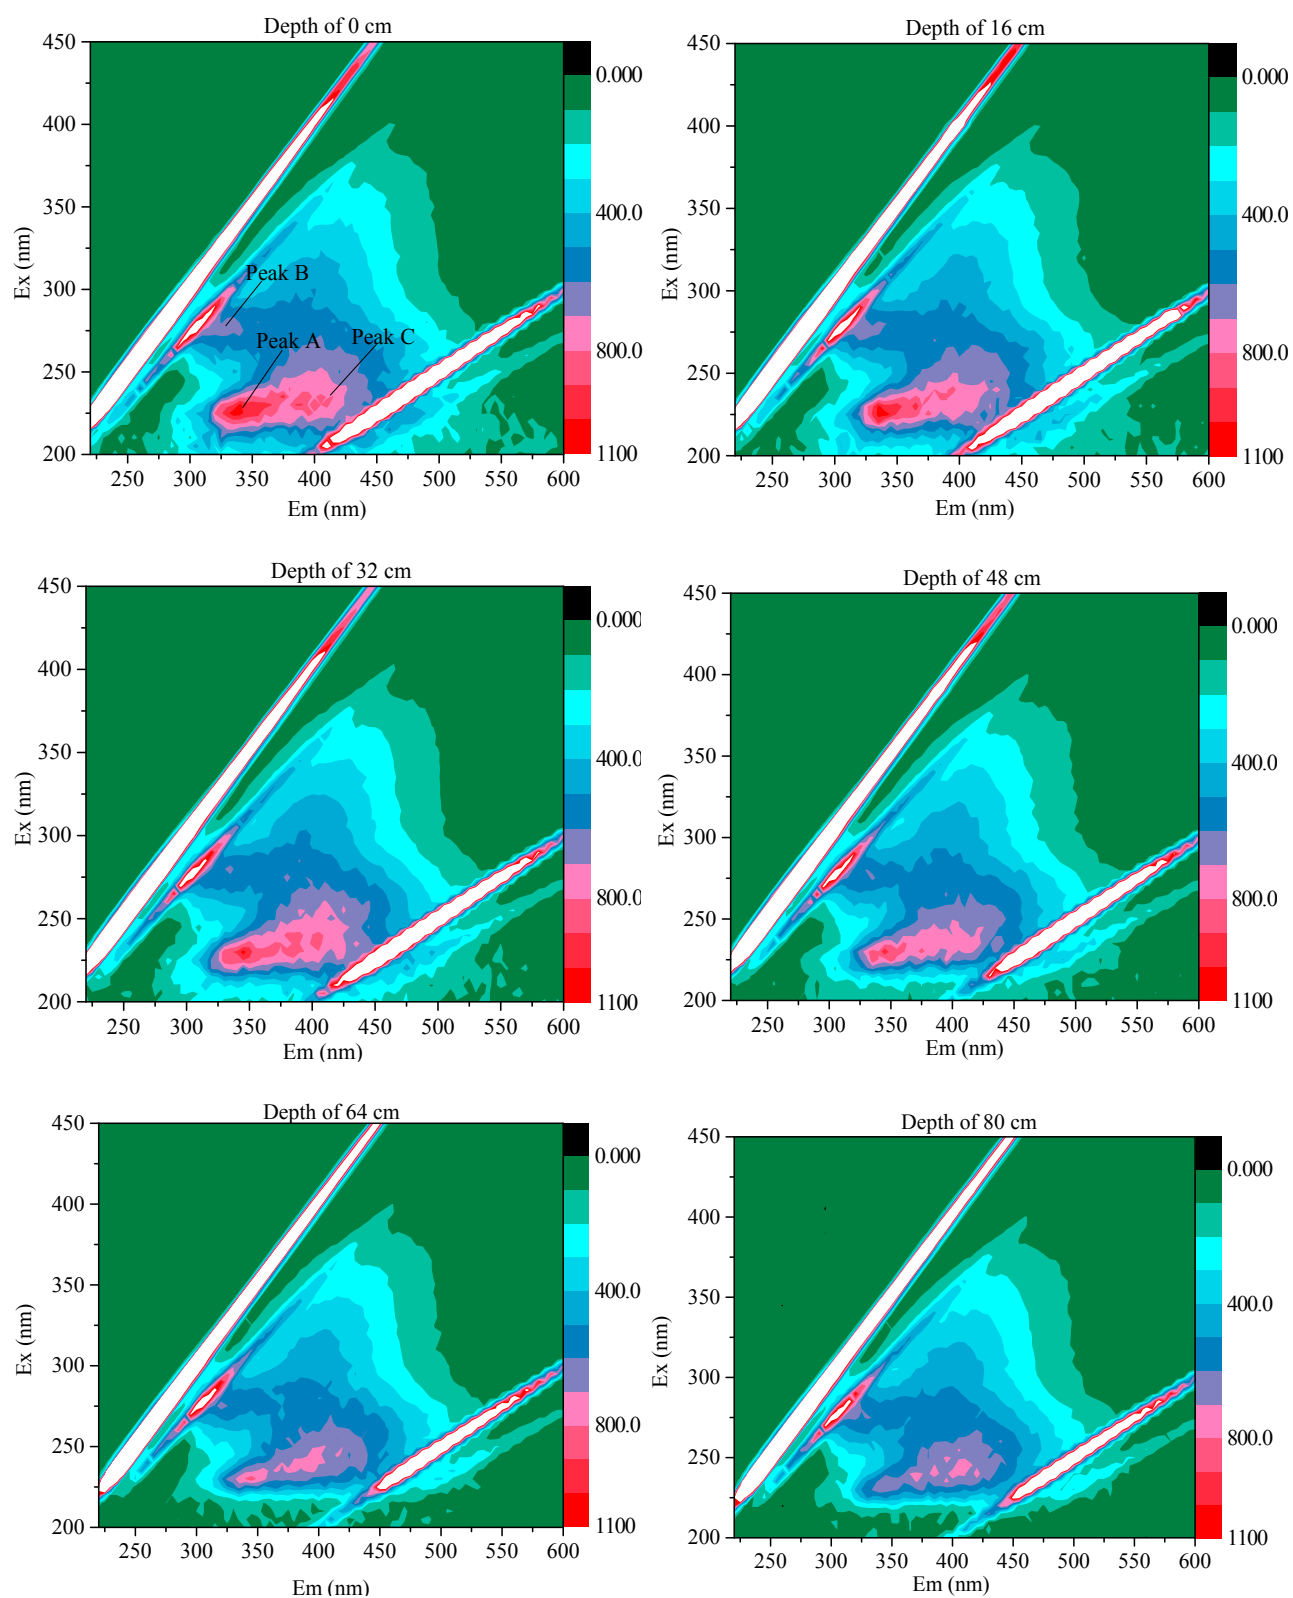

(b)

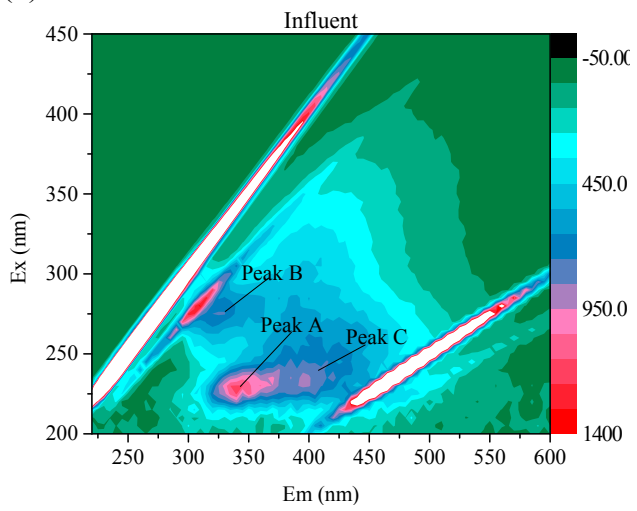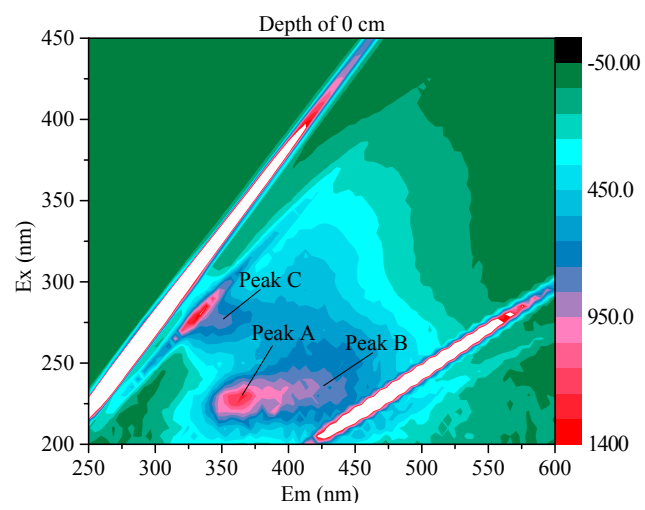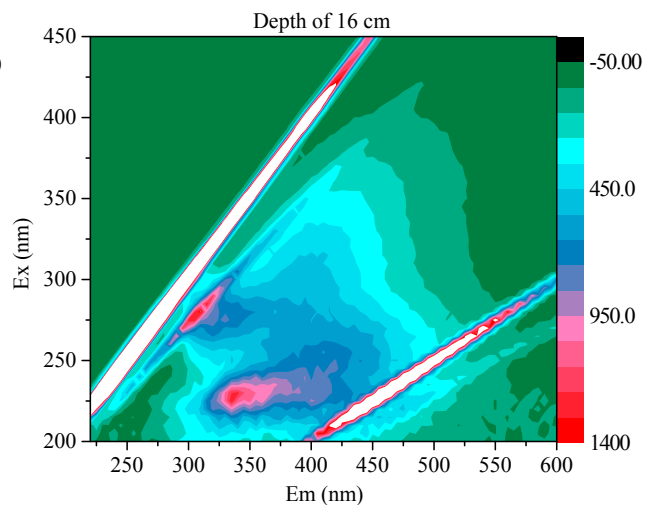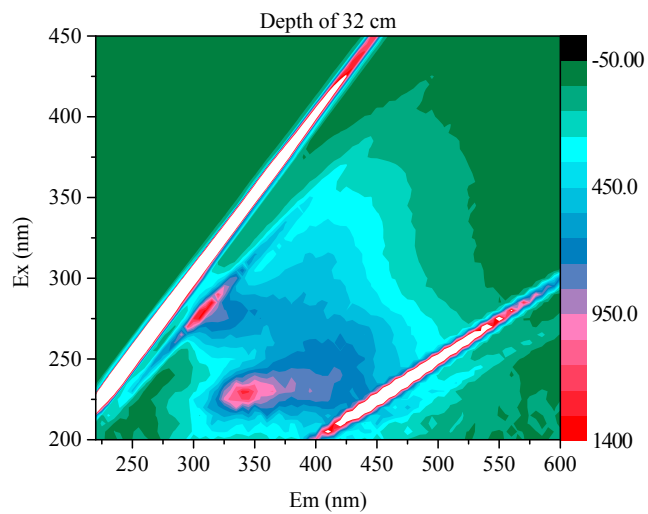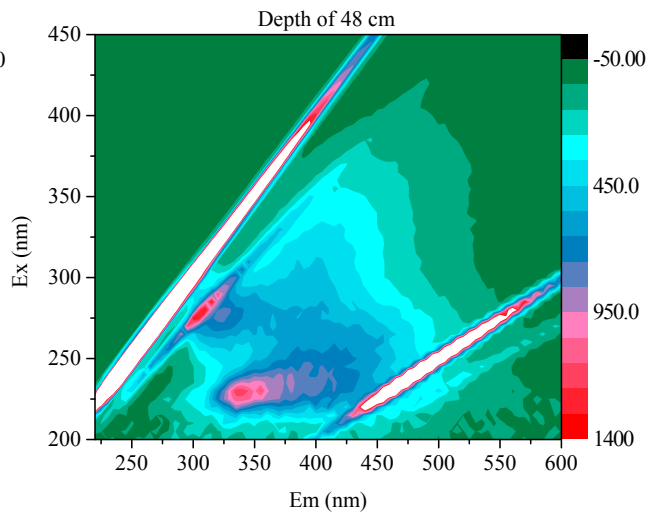

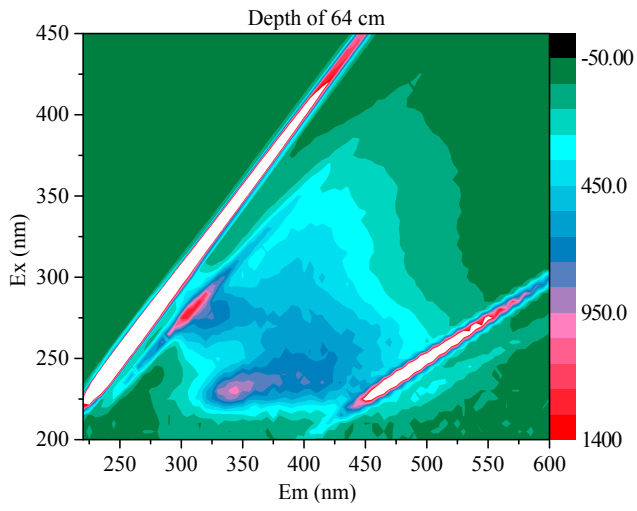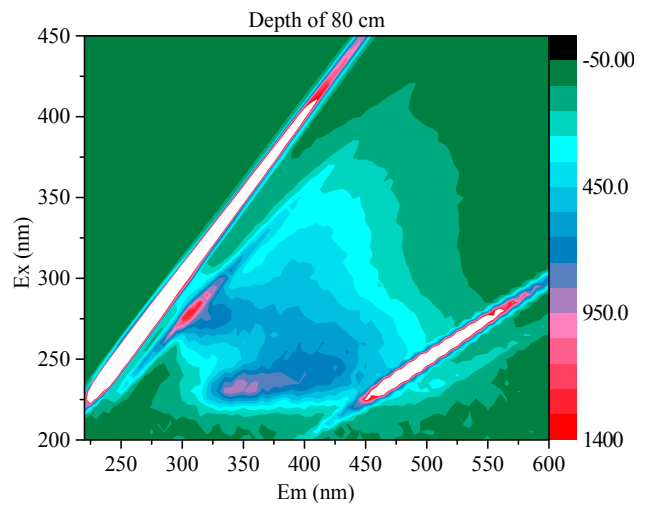

(c)

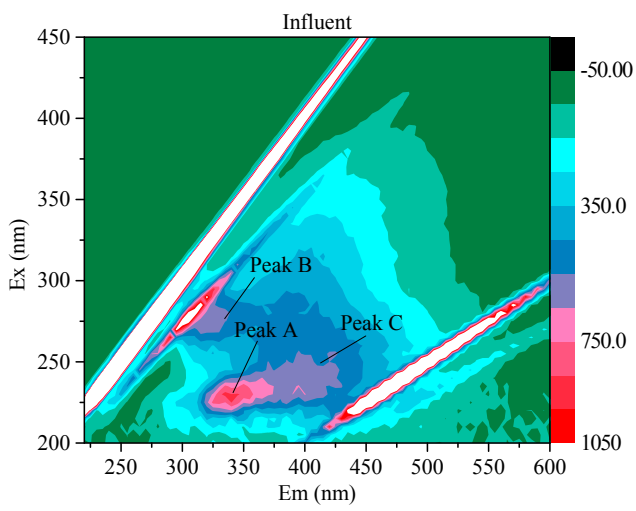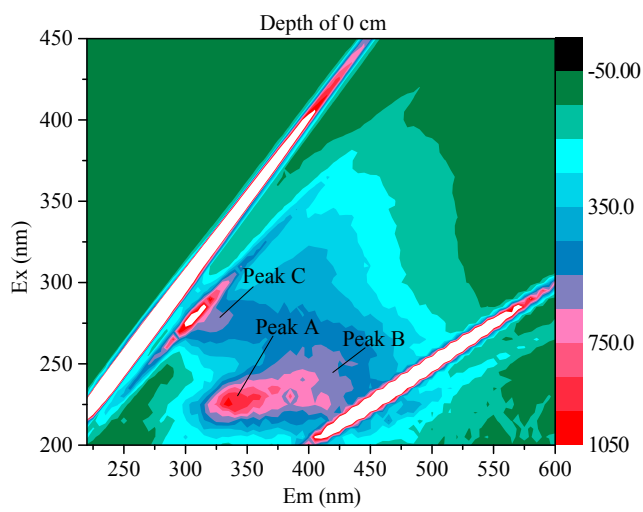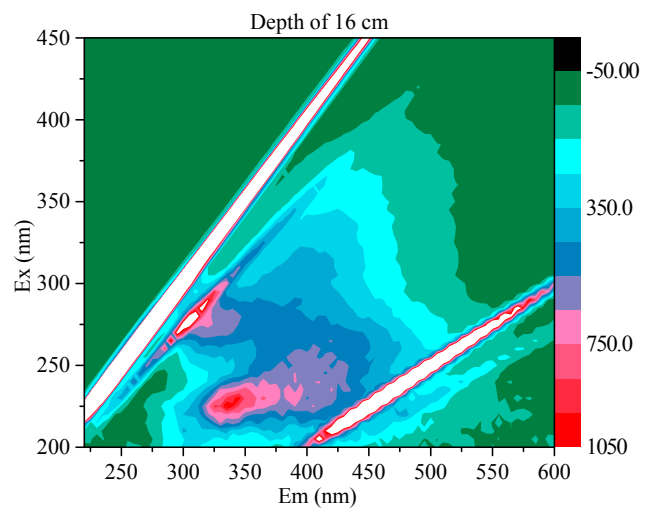

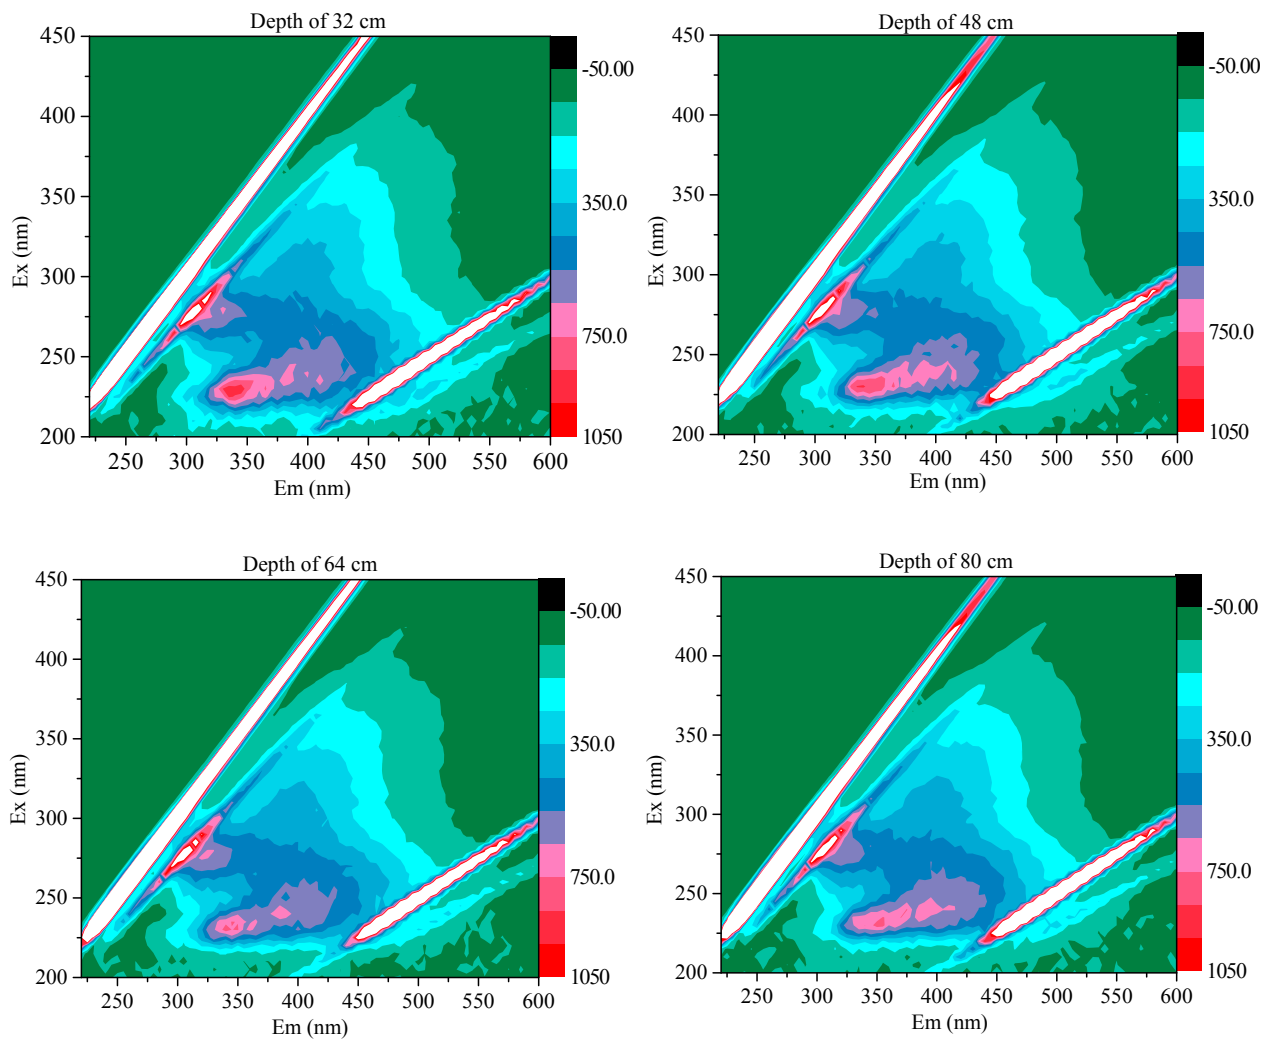

**Fig. 1** EEM fluorescence spectra of DOC and DON at different media depth of BAF: (a) Samples taken on May 30<sup>th</sup>; (b) Samples taken on June 5<sup>th</sup>; (c) Samples taken on June 9<sup>th</sup>
